# Supplementary material for: Organoditelluride-tethered polymers that spontaneously generate nitric oxide when in contact with fresh blood
Source: Royal Society of Chemistry journal article supplement (doi:10.1039/b715523a), 2008-01-01
Supplement: b715523a.pdf [file b715523a.pdf]

# Supplementary Information

## Organoditelluride-Tethered Polymers that Spontaneously Generate Nitric Oxide when in Contact with Fresh Blood

*Sangyeul Hwang and Mark E. Meyerhoff\**

[\*] Department of Chemistry, The University of Michigan  
930 North University Avenue, Ann Arbor, MI, 48109-1055 (USA)  
Fax: (+1)734-647-4865  
E-mail: [mmeyerho@umich.edu](mailto:mmeyerho@umich.edu)

### Content

- (1) Scheme for NOA measurement (Fig. 1s)**
- (2) NOA data (Figs. 2s & 3s)**
- (3) Amperometric NO sensor (Fig. 4s)**
- (4) NO and/or GSNO calibration for the NO & RSNO sensor (Fig. 5s)**

**(1) Scheme for NOA measurement**

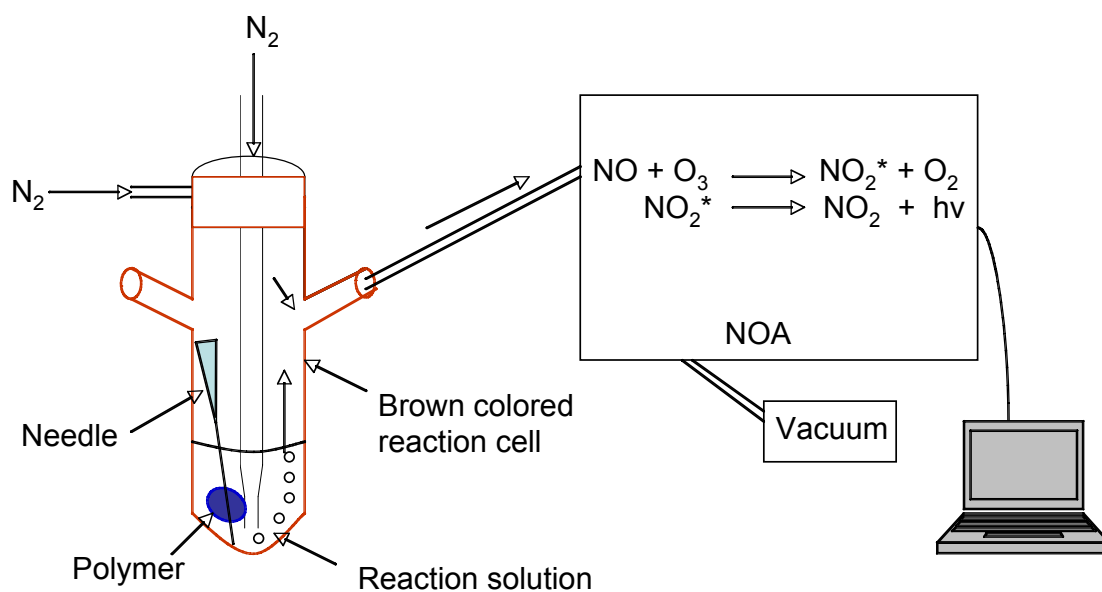

Fig. 1s. Scheme for NO measurement by inserting/removing a NO generating polymer with a stainless steel-needle into/from the reaction solution (RSNO and RSH in PBS buffer, pH 7.4, at RT) in an amber cell connected to the chemiluminescence nitric oxide analyzer (NOA).

## (2) NOA Data

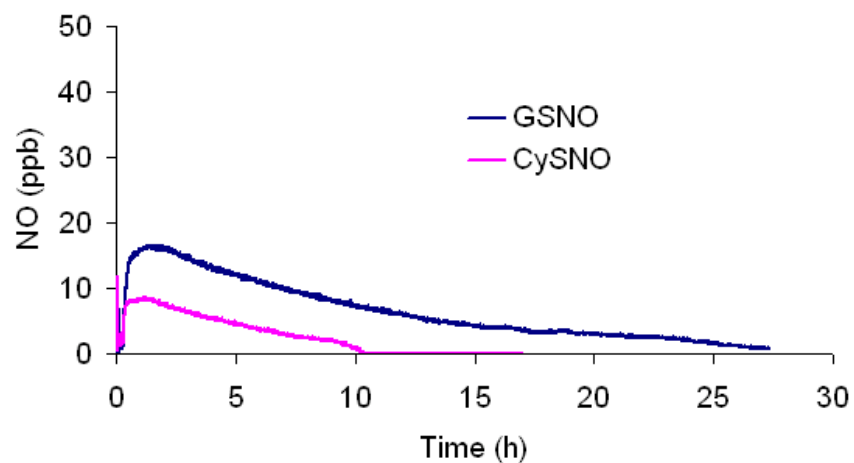

Fig. 2s. Polymer **3** (H film; 1 cm x 1 m x 50  $\mu\text{m}$ )-mediated complete decomposition of low molecular weight endogenous RSNOs to NO; 50  $\mu\text{M}$  GSNO/GSH (97 % conversion), or 10  $\mu\text{M}$  CyNO/CySH (91% conversion) in 2 mL of PBS buffer, pH 7.4 containing 0.5 mM EDTA.

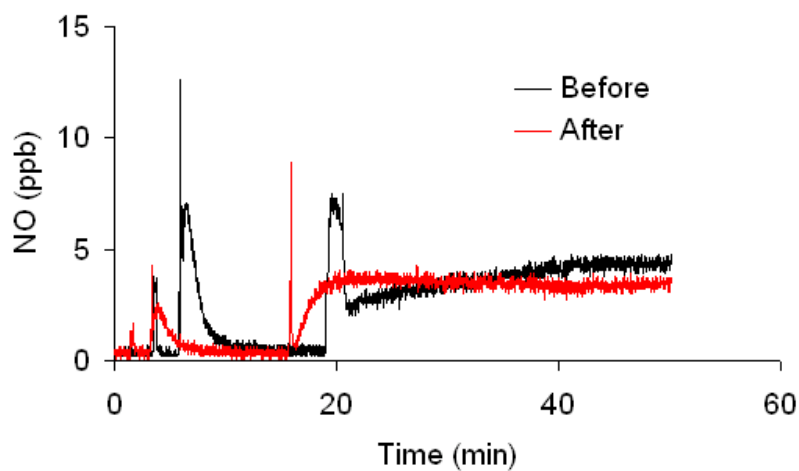

Fig. 3s. Comparison of NO flux of polymer **3** (L film; 1 cm x 1m x 50  $\mu$ m) before (black line) and after (red line) soaking in GSNO/GSH solution for 7 days at RT (10  $\mu$ L of 5 mM solutions were added daily to 5 mL of PBS buffer, pH 7.4, containing 0.1 mM EDTA) There is approx.a 21 % decrease in NO generation at steady-state level after soaking for 7 days (reaction condition; 50  $\mu$ M GSH/GSNO, 0.1mM EDTA in 2 mL of PBS buffer, pH 7.4).

### (3) Amperometric NO sensor

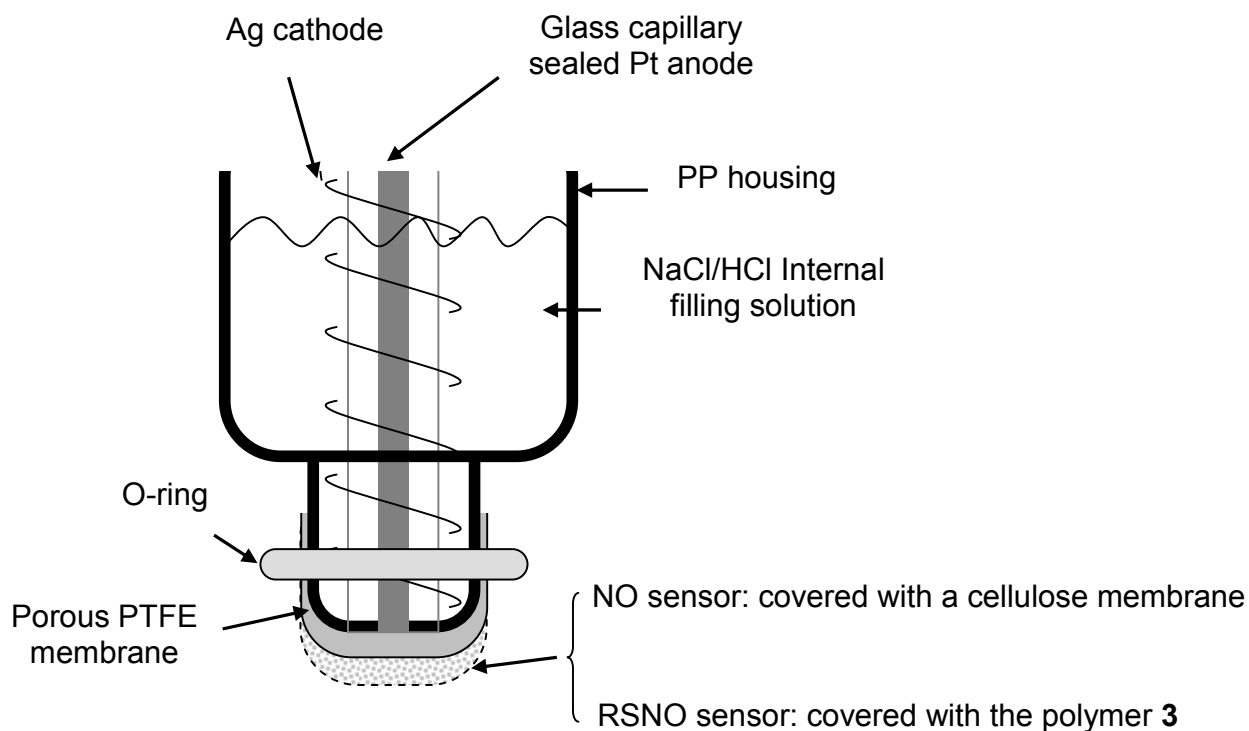

Fig. 4s. Typical configuration for both NO and RSNO sensor, where a cellulose membrane was mounted on the distance tip of the sensor for a control NO sensor, and polymer **3** was mounted instead of a blank cellulose membrane to prepare the RSNO sensor.

**(4) NO and/or GSNO calibration for the NO & RSNO sensor**

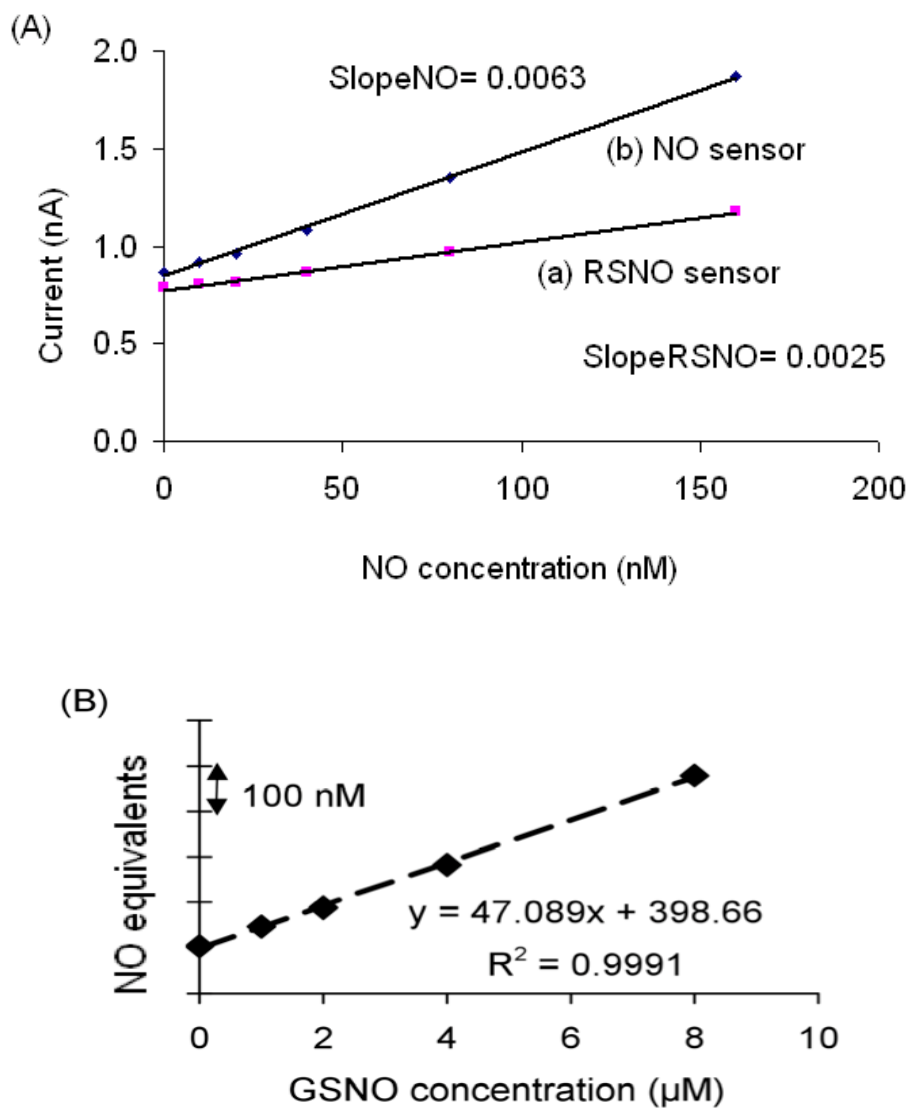

Fig. 5s. (A) Calibration curves for the inherent NO responses of both RSNO (a) and NO sensors (b) in the PBS buffer (pH 7.4, 100 mL) containing 0.1 mM EDTA at 35 °C; (B) calibration curve for the inherent GSNO response of RSNO sensor (a) in a blood sample (30 mL) diluted in PBS buffer (pH 7.4, 70 mL) containing 50  $\mu\text{M}$  GSH and 0.1 mM EDTA at 35 °C.
